# Supplementary material for: High power enzymatic biofuel cell based on naphthoquinone-mediated oxidation of glucose by glucose oxidase in a carbon nanotube 3D matrix
Source: Royal Society of Chemistry journal article supplement (doi:10.1039/c3cp50767j), 2013-01-01
Supplement: c3cp50767j.pdf [file c3cp50767j.pdf]

Cite this: DOI: 10.1039/c0xx00000x

www.rsc.org/xxxxxx

ARTICLE TYPE

## Supporting Informations

### Naphtoquinone-mediated oxidation of glucose by glucose oxidase in a carbon nanotube 3D matrix. Application to a high power enzymatic glucose/O<sub>2</sub> biofuel cell.

Bertrand Reuillard<sup>a</sup>, Alan Le Goff<sup>a</sup>, Charles Agnès<sup>a</sup>, Michael Holzinger<sup>a</sup>, Abdelkader Zebda<sup>a</sup>, Kamal Elouarzaki, Chantal Gondran<sup>a</sup> and Serge Cosnier<sup>\*a</sup>

Received (in XXX, XXX) Xth XXXXXXXXXX 20XX, Accepted Xth XXXXXXXXXX 20XX

DOI: 10.1039/b000000x

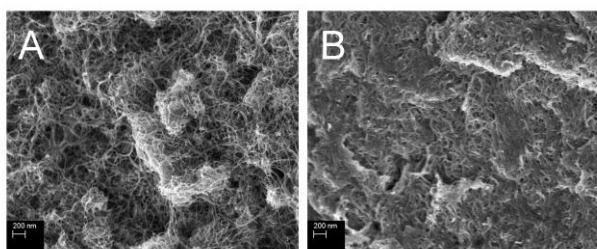

Figure S1. SEM images of MWCNT electrodes (A) before, (B) after electropolymerisation of 0.1M pyrrole in 0.1M PSS at 0.9 V during 10min.

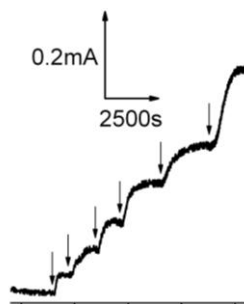

Figure S2. Chronoamperometry at 0.2V vs SCE for a GOX/NQ/catalase bioanode with 5 mg NQ with different concentrations of glucose: 5, 10, 20, 43, 76, 120 mM (0.2 mol L<sup>-1</sup> PBS, pH 7, 40°C).

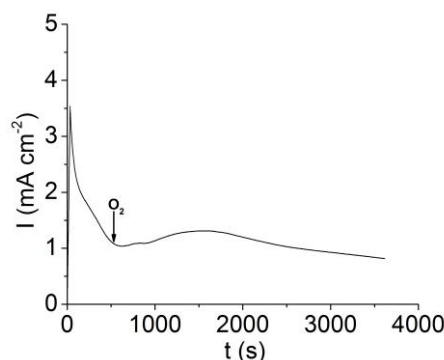

Figure S3. One-hour constant discharge of the GBFC at 0.5V in 0.2M PBS buffer (pH7, 25°C) with constant bubbling of oxygen.

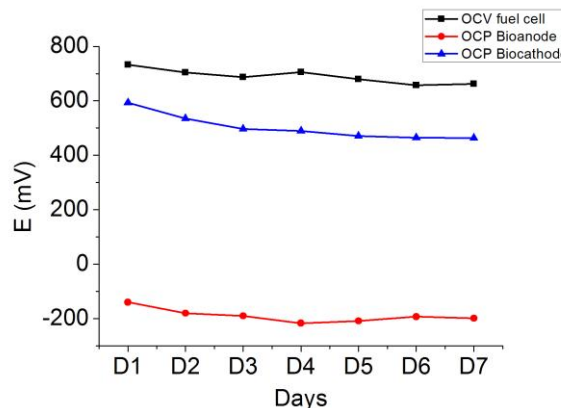

Figure S4. OCP of biocathode (blue) and bioanode (red) and OCV of the GBFC (black) monitored each day during one week. The GBFC was discharged each day during one minute at 0.6V (0.2M PBS, pH 7, RT)
